# Supplementary material for: Exposure to Anthropogenic Areas May Influence Colonization by Zoonotic Microorganisms in Scavenging Birds
Source: MDPI journal article supplement (doi:10.3390/ijerph18105231), 2021-05-14
Supplement: s1 [file s1]

## Supplementary Materials

**Table S1.** Studies used to compare our results from wild and captive condors with vulture species using natural or anthropized sites from other parts of the world.

| Species                                              | Environment* | Occurrence        | IC 95%    | Country              | Reference             |
|------------------------------------------------------|--------------|-------------------|-----------|----------------------|-----------------------|
| Egyptian vulture<br>( <i>Neophron percnopterus</i> ) | Anthropized  | 29.2% (28/96)     | 21.0-38.9 | Spain                | [1]#                  |
| Griffon vulture<br>( <i>Gyps fulvus</i> )            | Anthropized  | 61.1% (11/18)     | 38.6-79.7 | Spain                | [1]#                  |
| Griffon vulture<br>( <i>Gyps fulvus</i> )            | Anthropized  | 26.3 % (26/99)    | 18.6-35.7 | Spain                | [2]#                  |
| Griffon vulture<br>( <i>Gyps fulvus</i> )            | Anthropized  | 0% (0/10)         | 0-27.8    | Croatia              | [3]#                  |
| Griffon vulture<br>( <i>Gyps fulvus</i> )            | Anthropized  | 52.6 % (51/97)    | 42.7-62.2 | Spain                | [4]                   |
| Griffon vulture<br>( <i>Gyps fulvus</i> )            | Anthropized  | 21.2 % (22/104)   | 14.4-30   | Spain                | [5]                   |
| Griffon vulture<br>( <i>Gyps fulvus</i> )            | Anthropized  | 13.3 (10/75)      | 7.4-22.8  | Spain                | [6]                   |
| Griffon vulture<br>( <i>Gyps fulvus</i> )            | Anthropized  | 33.3% (5/15)      | 15.2-58.3 | Serbia               | [7]#                  |
| Griffon vulture<br>( <i>Gyps fulvus</i> )            | Anthropized  | 16.7% (31/186)    | 12-22.7   | Spain                | [8]**#                |
| Black vulture<br>( <i>Coragyps atratus</i> )         | Anthropized  | 33.3 % (1/3)      | 6.1-79.2  | Trinidad             | [9]                   |
| Black vulture<br>( <i>Coragyps atratus</i> )         | Anthropized  | 11.8% (8/68)      | 6.1-21.5  | Argentina            | [10]                  |
| Black vulture<br>( <i>Coragyps atratus</i> )         | Natural      | 6.2% (4/64)       | 2.5-15.0  | Argentina            | [10]                  |
| Andean condor<br>( <i>Vultur gryphus</i> )           | Anthropized  | 2.81 % (2/71)     | 1.0-9.7   | Argentina            | This study            |
| Andean condor<br>( <i>Vultur gryphus</i> )           | Natural      | 0% (0/56)         | 0-6.4     | Argentina            | This study            |
| Turkey vulture<br>( <i>Cathartes aura</i> )          | Natural      | 16.7% (3/18)      | 5.8-39.2  | USA                  | [11]                  |
| Turkey vulture<br>( <i>Cathartes aura</i> )          | Anthropized  | 21.6% (8/37)      | 11.4-37.2 | USA                  | [11]                  |
| Pooling of vulture<br>species from Europe            | Anthropized  | 26% (184/700)     | 23-30     | Diverse<br>countries | [1-8]                 |
| Pooling of vulture<br>species from America           | Anthropized  | 11.0%<br>(19/177) | 7-16      | Diverse<br>countries | [9-11] and this study |
| Pooling of vulture<br>species from America           | Natural      | 5.0%<br>(7/138)   | 2-10      | Diverse<br>countries | [9-11] and this study |

\* **Anthropized** refers to vultures feeding in intensive farm productions (e.g., feeding stations) or organic waste from rubbish dumps.

\*\* For this study, we only included individuals that were not sampled in previous studies performed by these authors [1, 2].

# These studies were performed based on fecal samples, while the rest were performed based on cloacae swabs

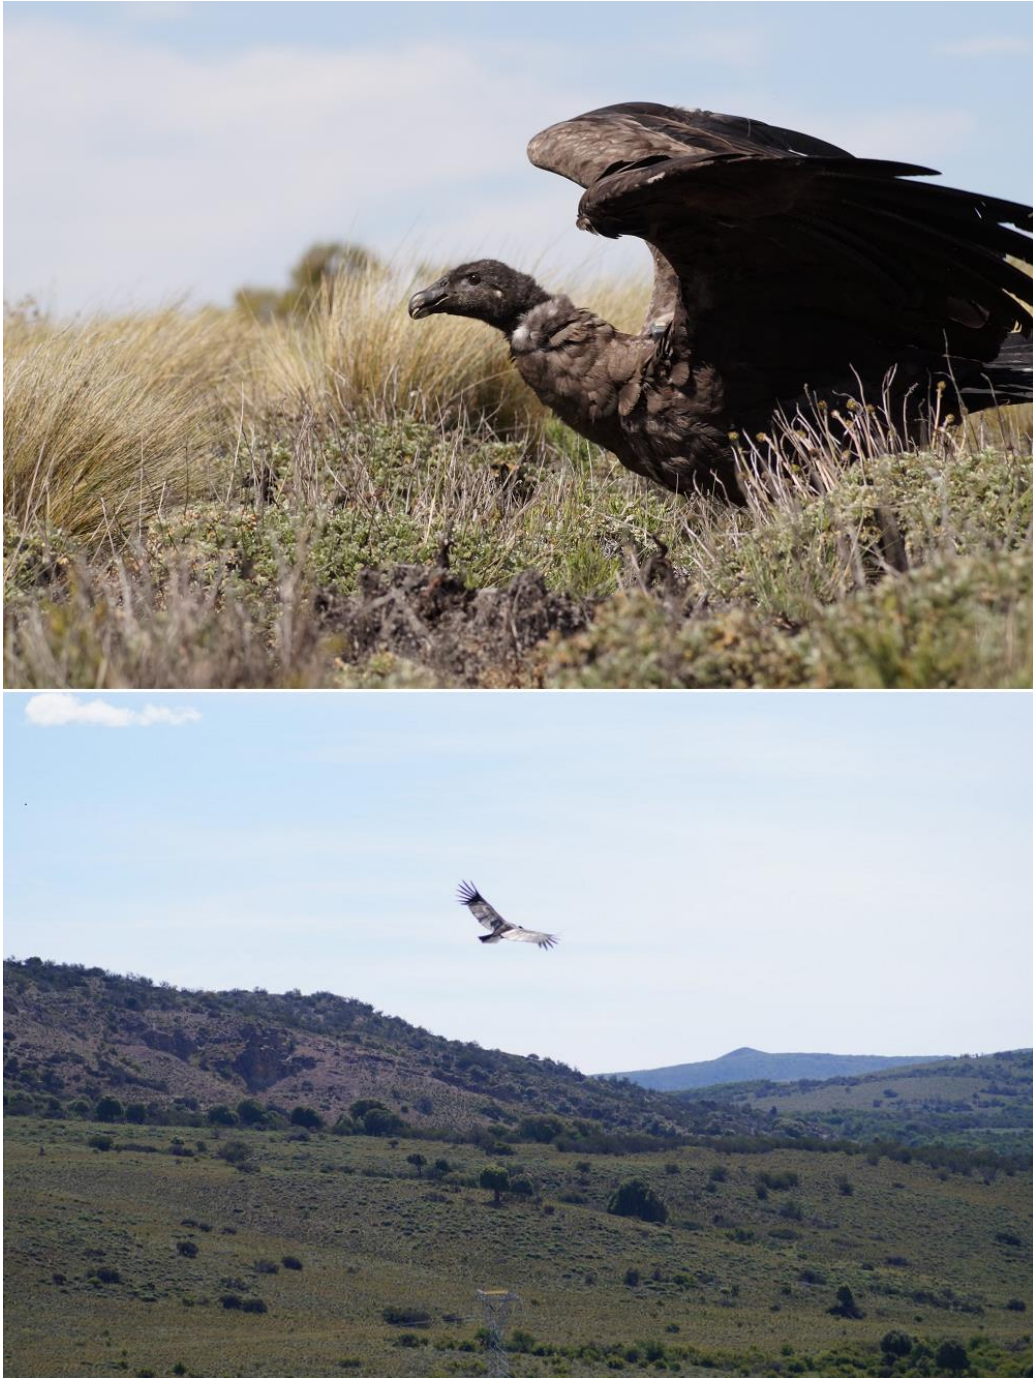

**Figure S1.** Juvenile female wild Andean condor trapped for sampling (Photo: Gonzalo Ignasi) and environment of trapping site in northern Patagonia, Argentina (Photo: Jorgelina Guido).



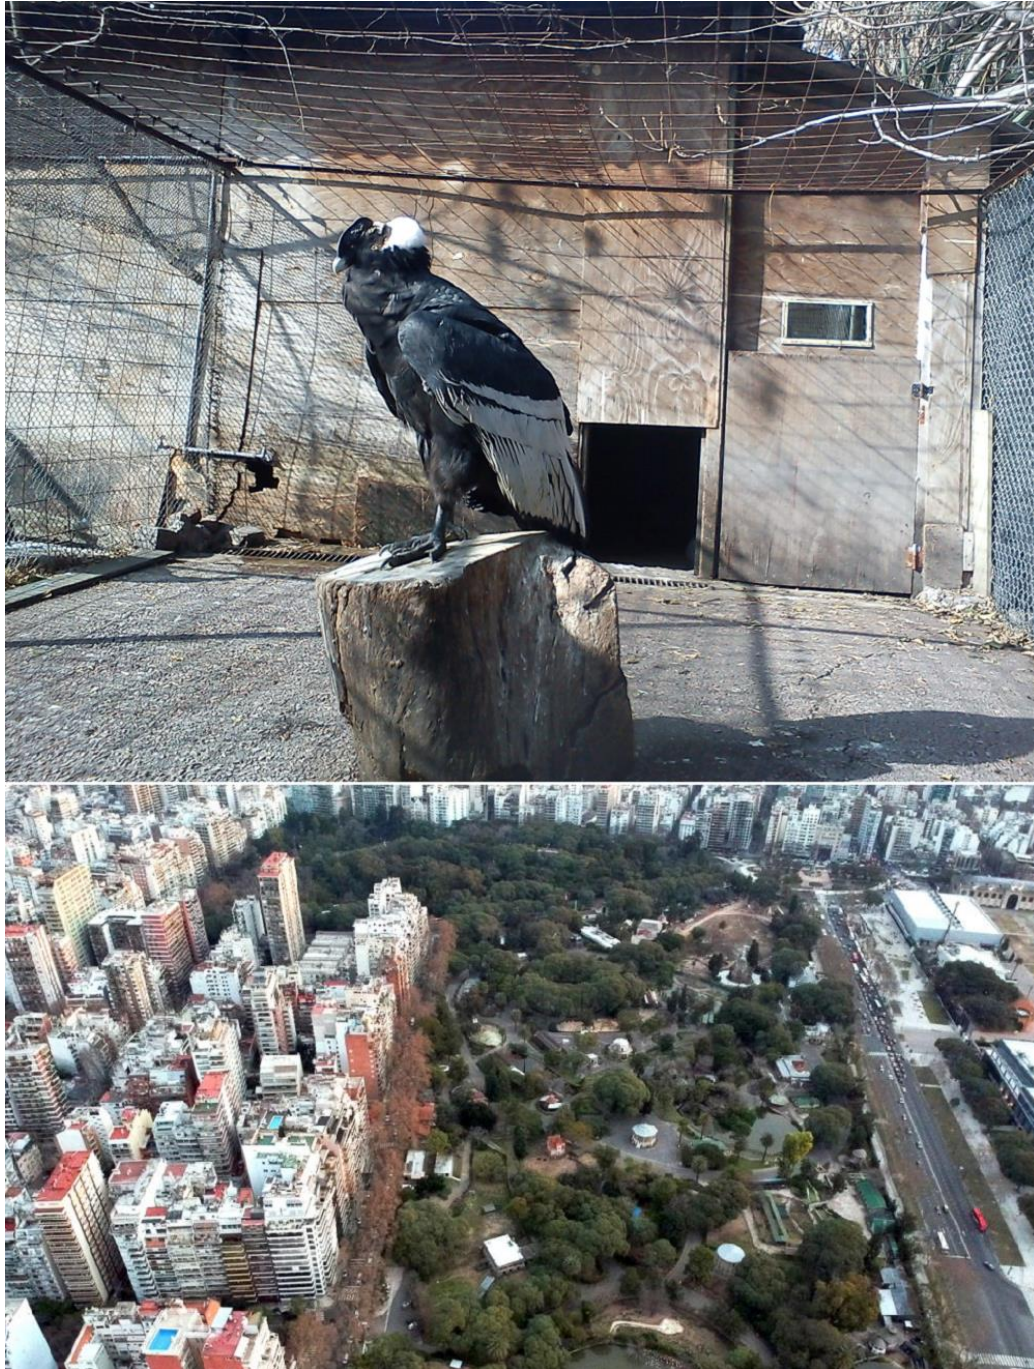

**Figure S2.** Adult male Andean condor admitted for rehabilitation at Buenos Aires Zoo, Argentina. (Photo: Guillermo Wiemeyer) and Buenos Aires Zoo aerial view (Photographic credit: accessed online <https://www.la-voz.com.ar/listas/zoo-de-buenos-aires-supervivientes/>)

## Supplementary Material References

1. Blanco, G. Supplementary Feeding as a Source of Multiresistant Salmonella in Endangered Egyptian Vultures. *Transboundary and emerging diseases* **2018**.
2. Blanco, G.; de Tuesta, J.A.D. Culture-and Molecular-Based Detection of Swine-Adapted Salmonella Shed by Avian Scavengers. *Science of the Total Environment* **2018**, 634, 1513–1518.
3. Kocijan, I.; Prukner-Radovčić, E.; Beck, R.; Galov, A.; Marinculić, A.; Sušić, G. Microflora and Internal Parasites of the Digestive Tract of Eurasian Griffon Vultures (*Gyps Fulvus*) in Croatia. *European Journal of Wildlife Research* **2009**, 55, 71–74.
4. Marin, C.; Palomeque, M.-D.; Marco-Jiménez, F.; Vega, S. Wild Griffon Vultures (*Gyps Fulvus*) as a Source of Salmonella and Campylobacter in Eastern Spain. *PLoS One* **2014**, 9, e94191.
5. Marin, C.; Torres, C.; Marco-Jiménez, F.; Cerdà-Cuellar, M.; Sevilla, S.; Ayats, T.; Vega, S. Supplementary Feeding Stations for Conservation of Vultures Could Be an Important Source of Monophasic Salmonella Typhimurium 1, 4,[5], 12: I:-. *Science of the Total Environment* **2018**, 636, 449–455.
6. Vela, A.I.; Casas-Díaz, E.; Fernández-Garayzábal, J.F.; Serrano, E.; Agustí, S.; Porrero, M.C.; Sánchez del Rey, V.; Marco, I.; Lavín, S.; Domínguez, L. Estimation of Cultivable Bacterial Diversity in the Cloacae and Pharynx in Eurasian Griffon Vultures (*Gyps Fulvus*). *Microb Ecol* **2015**, 69, 597–607, doi:10.1007/s00248-014-0513-3.
7. Milanov, D.; Fabijan, D.; Prunić, B.; Velhner, M.; Petrović, T. Enteric Bacteria in Fecal Samples of Eurasian Griffon Vultures. *Arhiv Veterinarske Medicine* **2013**, 6, 45–53.
8. Blanco, G.; de Tuesta, J.A.D. Seasonal and Spatial Occurrence of Zoonotic Salmonella Serotypes in Griffon Vultures at Farmland Environments: Implications in Pathogen Pollution and Ecosystem Services and Disservices. *Science of The Total Environment* **2021**, 758, 143681.
9. Adesiyun, A.A.; Seepersadsingh, N.; Inder, L.; Caesar, K. Some Bacterial Enteropathogens in Wildlife and Racing Pigeons from Trinidad. *Journal of Wildlife Diseases* **1998**, 34, 73–80.
10. Plaza, P.I.; Blanco, G.; Madariaga, J.; Boeri, E.; Teijeiro, M.L.; Bianco, G.; Lambertucci, S. Scavenger Birds Exploiting Rubbish Dumps: Pathogens at the Gates. *Transboundary and emerging diseases* **2018**.
11. Sulzner, K.; Kelly, T.; Smith, W.; Johnson, C.K. Enteric Pathogens and Antimicrobial Resistance in Turkey Vultures (*Cathartes Aura*) Feeding at the Wildlife–Livestock Interface. *Journal of Zoo and Wildlife Medicine* **2014**, 45, 931–934.
